# Supplementary material for: A Comprehensive Quality Analysis of Different Colors of Medicinal and Edible Honeysuckle
Source: MDPI journal article supplement (doi:10.3390/foods12163126), 2023-08-20

**Table S1.** The information of collected honeysuckle samples.

| No. | Origin           | Place              | Collection date | Color |
|-----|------------------|--------------------|-----------------|-------|
| 1   | Fengqiu, Henan   | Medicinal market   | 2022.01.19      | YW    |
| 2   | Fengqiu, Henan   | Medicinal market   | 2022.01.23      | YG    |
| 3   | Changyuan, Henan | Peasant household  | 2022.01.25      | YG    |
| 4   | Changyuan, Henan | Planting warehouse | 2022.02.10      | YG    |
| 5   | Xinmi, Henan     | Enterprise         | 2022.02.10      | YG    |
| 6   | Fengqiu, Henan   | Hospital           | 2022.02.11      | YG    |
| 7   | Xinmi, Henan     | Hospital           | 2022.02.16      | YG    |
| 8   | Changyuan, Henan | Peasant household  | 2022.02.16      | YG    |
| 9   | Bozhou, Anhui    | Medicinal market   | 2022.02.16      | YG    |
| 10  | Xinmi, Henan     | Enterprise         | 2022.02.19      | YW    |
| 11  | Pingyi, Shandong | Hospital           | 2022.02.27      | YG    |
| 12  | Pingyi, Shandong | Planting warehouse | 2022.02.28      | YG    |
| 13  | Julu, Hebei      | Medicinal market   | 2022.02.28      | YG    |
| 14  | Pingyi, Shandong | Peasant household  | 2022.02.28      | Y     |
| 15  | Xinxiang, Henan  | Enterprise         | 2022.03.04      | Y     |
| 16  | Xinxiang, Henan  | Peasant household  | 2022.03.04      | Y     |
| 17  | Fengqiu, Henan   | Peasant household  | 2022.03.05      | YG    |
| 18  | Fengqiu, Henan   | Enterprise         | 2022.03.08      | YG    |
| 19  | Xinxiang, Henan  | Hospital           | 2022.03.08      | GW    |
| 20  | Fengqiu, Henan   | Planting warehouse | 2022.03.08      | Y     |
| 21  | Fengqiu, Henan   | Medicinal market   | 2022.03.08      | Y     |
| 22  | Pingyi, Shandong | Medicinal market   | 2022.03.08      | Y     |
| 23  | Pingyi, Shandong | Medicinal market   | 2022.03.10      | YW    |
| 24  | Pingyi, Shandong | Hospital           | 2022.03.10      | GW    |
| 25  | Pingyi, Shandong | Planting warehouse | 2022.03.11      | YB    |
| 26  | Pingyi, Shandong | Enterprise         | 2022.03.12      | YB    |
| 27  | Pingyi, Shandong | Peasant household  | 2022.03.14      | YB    |
| 28  | Julu, Hebei      | Medicinal market   | 2022.03.16      | Y     |
| 29  | Xinmi, Henan     | Medicinal market   | 2022.03.16      | Y     |
| 30  | Fengqiu, Henan   | Planting warehouse | 2022.03.16      | YG    |
| 31  | Fengqiu, Henan   | Medicinal market   | 2022.03.18      | YG    |
| 32  | Xinmi, Henan     | Peasant household  | 2022.03.20      | YG    |
| 33  | Pingyi, Shandong | Enterprise         | 2022.03.24      | YG    |
| 34  | Fengqiu, Henan   | Enterprise         | 2022.03.24      | YB    |

|    |                  |                    |            |    |
|----|------------------|--------------------|------------|----|
| 35 | Pingyi, Shandong | Enterprise         | 2022.03.27 | YG |
| 36 | Pingyi, Shandong | Planting warehouse | 2022.03.27 | Y  |
| 37 | Pingyi, Shandong | Peasant household  | 2022.03.29 | YG |
| 38 | Julu, Hebei      | Medicinal market   | 2022.03.29 | GW |
| 39 | Pingyi, Shandong | Medicinal market   | 2022.03.30 | GW |
| 40 | Pingyi, Shandong | Hospital           | 2022.03.30 | GW |
| 41 | Julu, Hebei      | Medicinal market   | 2022.03.30 | GW |
| 42 | Xinxiang, Henan  | Hospital           | 2022.03.30 | GW |
| 43 | Pingyi, Shandong | Medicinal market   | 2022.03.30 | GW |
| 44 | Pingyi, Shandong | Enterprise         | 2022.03.31 | GW |
| 45 | Xinmi, Henan     | Medicinal market   | 2022.04.03 | GW |
| 46 | Julu, Hebei      | Medicinal market   | 2022.04.06 | GW |
| 47 | Fengqiu, Henan   | Planting warehouse | 2022.04.06 | YG |
| 48 | Julu, Hebei      | Peasant household  | 2022.04.08 | GW |
| 49 | Pingyi, Shandong | Medicinal market   | 2022.04.09 | YG |
| 50 | Pingyi, Shandong | Medicinal market   | 2022.04.11 | Y  |
| 51 | Pingyi, Shandong | Medicinal market   | 2022.04.11 | YG |
| 52 | Pingyi, Shandong | Planting warehouse | 2022.04.11 | YG |
| 53 | Pingyi, Shandong | Medicinal market   | 2022.04.17 | Y  |
| 54 | Xinmi, Henan     | Enterprise         | 2022.04.17 | YG |
| 55 | Changyuan, Henan | Enterprise         | 2022.04.17 | YW |

---

**Table S2.** HPLC method validation analytical parameters.

| Name                   | Linearity              | $R^2$  | LOD <sup>a</sup><br>(µg/ml) | LOQ <sup>b</sup><br>(µg/ml) | Pre <sup>c</sup> (%RSD) |           | Acc <sup>d</sup><br>(%RSD) | Rep <sup>e</sup><br>(%RSD) |
|------------------------|------------------------|--------|-----------------------------|-----------------------------|-------------------------|-----------|----------------------------|----------------------------|
|                        |                        |        |                             |                             | Intra-day               | Inter-day |                            |                            |
| Neochlorogenic acid    | $Y = 15998X + 2435.4$  | 0.9999 | 0.14                        | 0.69                        | 1.77                    | 2.36      | 1.50                       | 1.47                       |
| Chlorogenic acid       | $Y = 611.87X + 19.216$ | 0.9998 | 0.16                        | 0.54                        | 1.26                    | 2.59      | 1.23                       | 2.15                       |
| Cryptochlorogenic acid | $Y = 208.4X - 65.271$  | 0.9995 | 0.22                        | 0.72                        | 2.39                    | 1.39      | 2.09                       | 1.62                       |
| Caffeic acid           | $Y = 51558X + 2868.7$  | 0.9993 | 0.13                        | 0.43                        | 1.93                    | 2.91      | 1.72                       | 3.25                       |
| Rutin                  | $Y = 10011X + 814.88$  | 0.9994 | 0.12                        | 0.41                        | 2.07                    | 2.56      | 1.91                       | 2.91                       |
| Cynaroside             | $Y = 20143X + 523.2$   | 0.9996 | 0.09                        | 0.30                        | 2.25                    | 1.31      | 3.82                       | 2.84                       |
| Isochlorogenic acid B  | $Y = 31139X + 662.76$  | 0.9996 | 0.05                        | 0.15                        | 1.33                    | 1.97      | 3.27                       | 1.03                       |
| Isochlorogenic acid A  | $Y = 33928X + 562.04$  | 0.9996 | 0.20                        | 0.68                        | 1.82                    | 2.29      | 2.81                       | 1.88                       |
| Isochlorogenic acid C  | $Y = 33388X + 3342.4$  | 0.9998 | 0.11                        | 0.38                        | 1.86                    | 2.77      | 2.60                       | 0.97                       |
| Quercetin              | $Y = 17198X - 529.10$  | 0.9997 | 0.16                        | 0.55                        | 2.59                    | 2.25      | 2.34                       | 1.93                       |

a: limit of detection; b: limit of quantitation; c: precision; d: accuracy; e: repeatability.

**Table S3.** Recoveries (%) for the evaluation of the developed HPLC method.

| Name                   | Sample weight<br>(g) | Content<br>(mg) | Added content<br>(mg) | Measured weight<br>(mg) | Recovery rate<br>(%) | RSD<br>(%) |
|------------------------|----------------------|-----------------|-----------------------|-------------------------|----------------------|------------|
| Neochlorogenic acid    | 0.5000               | 1.08            | 1.09                  | 2.15                    | 99.08                | 1.02       |
|                        | 0.5003               | 1.09            | 1.11                  | 2.23                    | 101.36               |            |
|                        | 0.5005               | 1.09            | 1.10                  | 2.18                    | 99.54                |            |
|                        | 0.5006               | 1.09            | 1.07                  | 2.15                    | 99.54                |            |
|                        | 0.5001               | 1.08            | 1.10                  | 2.15                    | 98.62                |            |
|                        | 0.5007               | 1.09            | 1.11                  | 2.17                    | 98.64                |            |
| chlorogenic acid       | 0.5000               | 3.04            | 3.06                  | 6.14                    | 100.66               | 0.62       |
|                        | 0.5003               | 3.04            | 3.08                  | 6.16                    | 100.65               |            |
|                        | 0.5005               | 3.04            | 3.03                  | 6.10                    | 100.49               |            |
|                        | 0.5006               | 3.04            | 3.05                  | 6.13                    | 100.66               |            |
|                        | 0.5001               | 3.04            | 3.02                  | 6.02                    | 99.34                |            |
|                        | 0.5007               | 3.04            | 3.04                  | 6.05                    | 99.51                |            |
| Cryptochlorogenic acid | 0.5000               | 0.42            | 0.44                  | 0.82                    | 95.35                | 2.97       |
|                        | 0.5003               | 0.42            | 0.45                  | 0.85                    | 97.70                |            |
|                        | 0.5005               | 0.42            | 0.41                  | 0.84                    | 101.20               |            |
|                        | 0.5006               | 0.43            | 0.46                  | 0.91                    | 102.25               |            |
|                        | 0.5001               | 0.42            | 0.44                  | 0.88                    | 102.33               |            |
|                        | 0.5007               | 0.43            | 0.42                  | 0.87                    | 102.35               |            |
| Caffeic acid           | 0.5000               | 2.49            | 2.51                  | 5.06                    | 101.20               | 1.16       |
|                        | 0.5003               | 2.49            | 2.46                  | 4.88                    | 98.59                |            |
|                        | 0.5005               | 2.5             | 2.53                  | 5.09                    | 101.19               |            |
|                        | 0.5006               | 2.5             | 2.51                  | 5.07                    | 101.20               |            |
|                        | 0.5001               | 2.49            | 2.46                  | 4.99                    | 100.81               |            |
|                        | 0.5007               | 2.5             | 2.47                  | 4.93                    | 99.20                |            |
| Rutin                  | 0.5000               | 0.14            | 0.16                  | 0.31                    | 103.33               | 1.98       |
|                        | 0.5003               | 0.14            | 0.15                  | 0.30                    | 103.45               |            |
|                        | 0.5005               | 0.14            | 0.13                  | 0.28                    | 103.70               |            |
|                        | 0.5006               | 0.14            | 0.14                  | 0.29                    | 103.57               |            |
|                        | 0.5001               | 0.14            | 0.15                  | 0.29                    | 100.00               |            |
|                        |                      |                 |                       |                         |                      |            |

|                       |        |      |      |      |        |      |
|-----------------------|--------|------|------|------|--------|------|
| Cynaroside            | 0.5007 | 0.15 | 0.16 | 0.33 | 106.45 | 1.98 |
|                       | 0.5000 | 0.12 | 0.10 | 0.22 | 100.00 |      |
|                       | 0.5003 | 0.12 | 0.09 | 0.21 | 100.00 |      |
|                       | 0.5005 | 0.12 | 0.11 | 0.24 | 104.35 |      |
|                       | 0.5006 | 0.13 | 0.13 | 0.27 | 103.85 |      |
|                       | 0.5001 | 0.12 | 0.14 | 0.27 | 103.85 |      |
| Isochlorogenic acid B | 0.5007 | 0.13 | 0.15 | 0.29 | 103.57 | 2.53 |
|                       | 0.5000 | 0.15 | 0.18 | 0.34 | 103.03 |      |
|                       | 0.5003 | 0.15 | 0.13 | 0.28 | 100.00 |      |
|                       | 0.5005 | 0.15 | 0.15 | 0.31 | 103.33 |      |
|                       | 0.5006 | 0.16 | 0.18 | 0.33 | 97.06  |      |
|                       | 0.5001 | 0.15 | 0.19 | 0.35 | 102.94 |      |
| Isochlorogenic acid A | 0.5007 | 0.16 | 0.14 | 0.31 | 103.33 | 1.15 |
|                       | 0.5000 | 3.65 | 3.69 | 7.45 | 101.50 |      |
|                       | 0.5003 | 3.65 | 3.70 | 7.28 | 99.05  |      |
|                       | 0.5005 | 3.65 | 3.68 | 7.43 | 101.36 |      |
|                       | 0.5006 | 3.66 | 3.63 | 7.36 | 100.96 |      |
|                       | 0.5001 | 3.65 | 3.64 | 7.21 | 98.90  |      |
| Isochlorogenic acid C | 0.5007 | 3.66 | 3.62 | 7.34 | 100.82 | 2.57 |
|                       | 0.5000 | 0.27 | 0.25 | 0.54 | 103.85 |      |
|                       | 0.5003 | 0.27 | 0.25 | 0.53 | 101.92 |      |
|                       | 0.5005 | 0.27 | 0.29 | 0.58 | 103.57 |      |
|                       | 0.5006 | 0.27 | 0.24 | 0.54 | 105.88 |      |
|                       | 0.5001 | 0.27 | 0.26 | 0.54 | 101.89 |      |
| Quercetin             | 0.5007 | 0.27 | 0.25 | 0.51 | 98.08  | 2.07 |
|                       | 0.5000 | 0.72 | 0.74 | 1.51 | 103.42 |      |
|                       | 0.5003 | 0.72 | 0.71 | 1.40 | 97.90  |      |
|                       | 0.5005 | 0.72 | 0.75 | 1.49 | 101.36 |      |
|                       | 0.5006 | 0.73 | 0.72 | 1.44 | 99.31  |      |
|                       | 0.5001 | 0.72 | 0.72 | 1.46 | 101.39 |      |
|                       | 0.5007 | 0.73 | 0.71 | 1.48 | 102.78 |      |

**Table S4.** The differential metabolites between GW and YG samples.

| No. | Rt (min) | Metabolites                      |
|-----|----------|----------------------------------|
| 1   | 1.84     | Secologanoside                   |
| 2   | 2.67     | Lamalbide                        |
| 3   | 4.16     | Secologanic acid                 |
| 4   | 4.63     | 1-Caffeoylquinic acid            |
| 5   | 4.64     | 4- <i>O</i> -caffeoylquinic acid |
| 6   | 6.38     | Quercetin 7- <i>O</i> -glucoside |

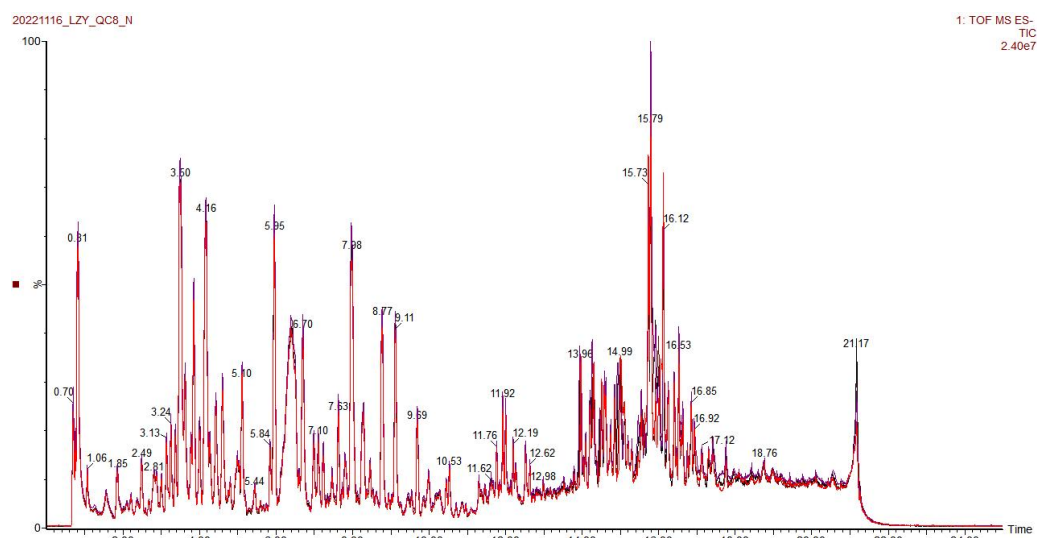

**Figure S1.** The overlapping TIC of different QC samples in negative ion mode.

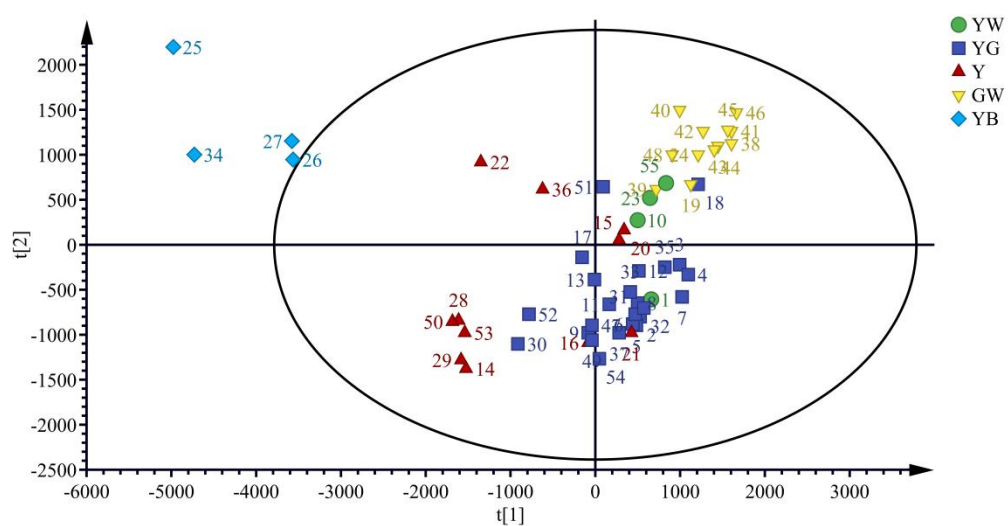

**Figure S2.** The principal component analysis (PCA) of honeysuckle samples. YW: yellow-white; YG: yellow-green; Y: yellow; GW: green-white; YB: yellow-brown.

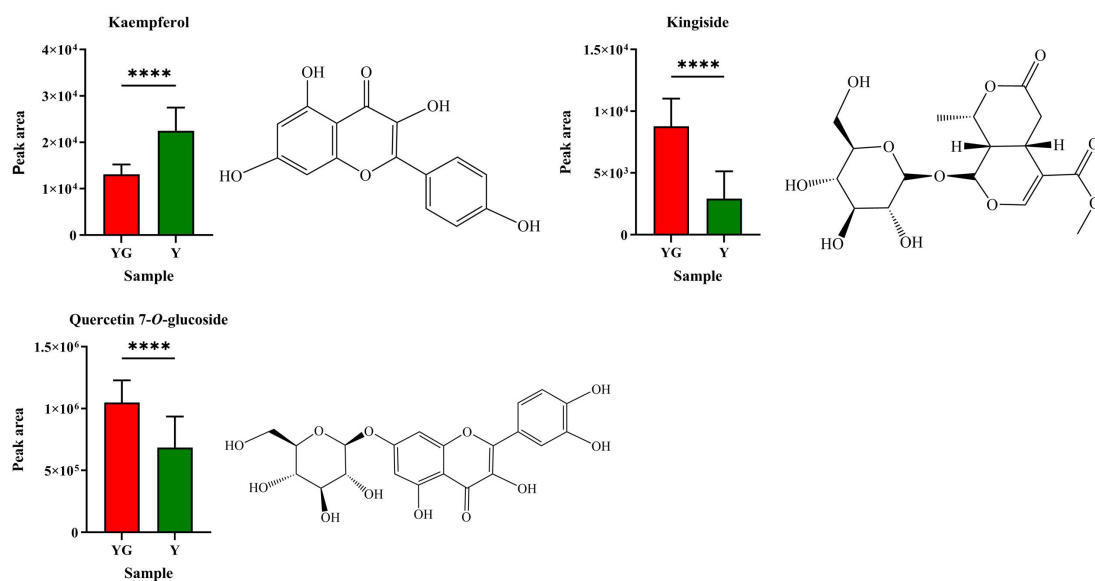

**Figure S3.** Differential metabolites in YG and Y samples. YG: yellow-green; Y: yellow (\*\*\*\*,  $p < 0.0001$ )

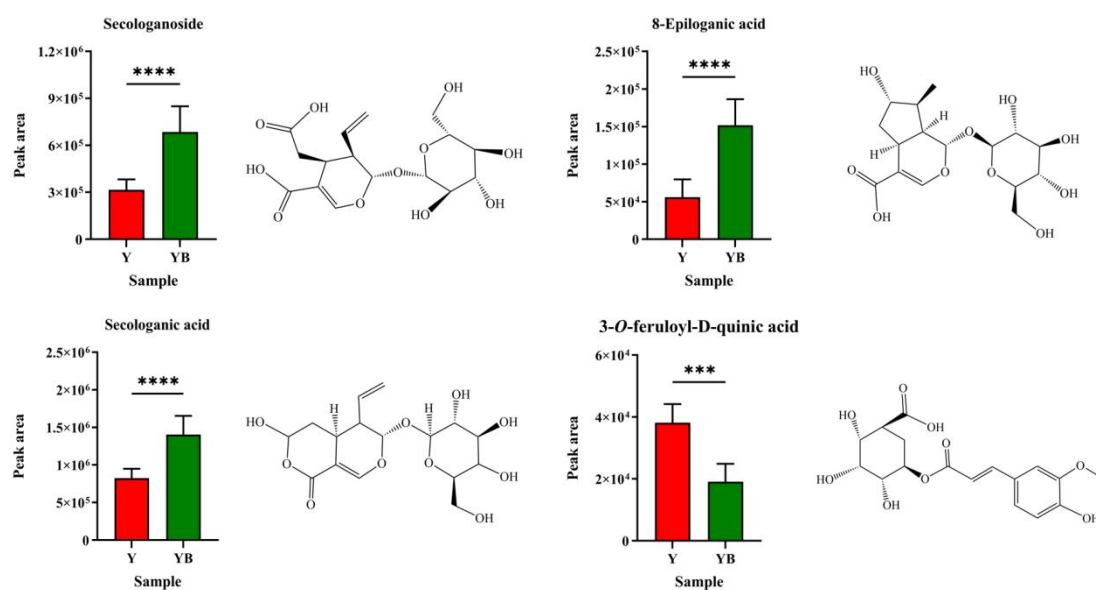



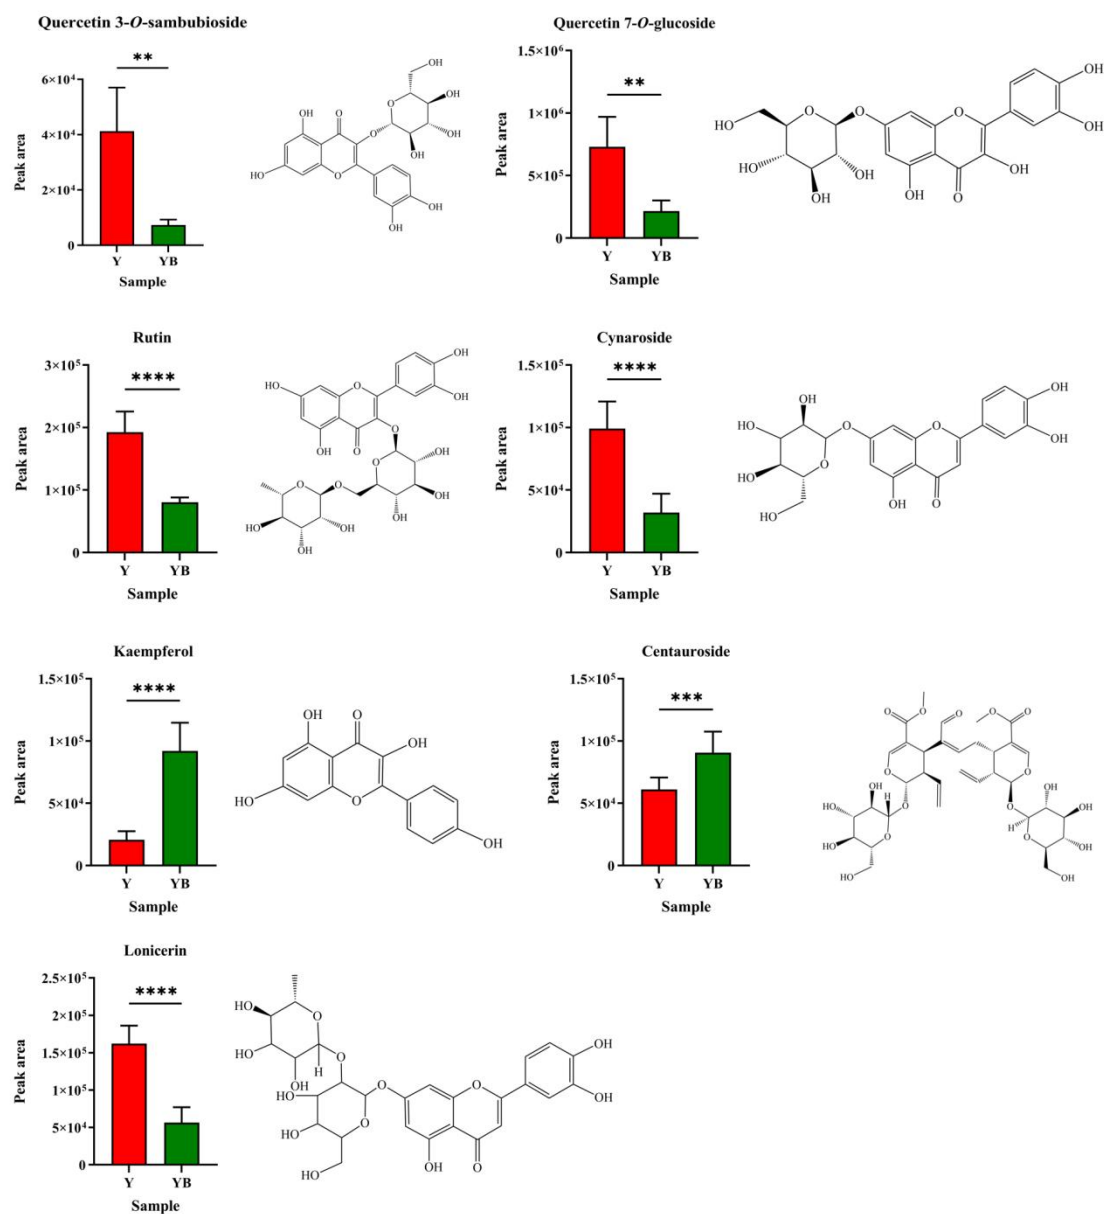

**Figure S4.** Differential metabolites in Y and YB samples. Y: yellow; YB: yellow-brown (\*\*,  $p < 0.001$ ; \*\*\*\*,  $p < 0.0001$ )

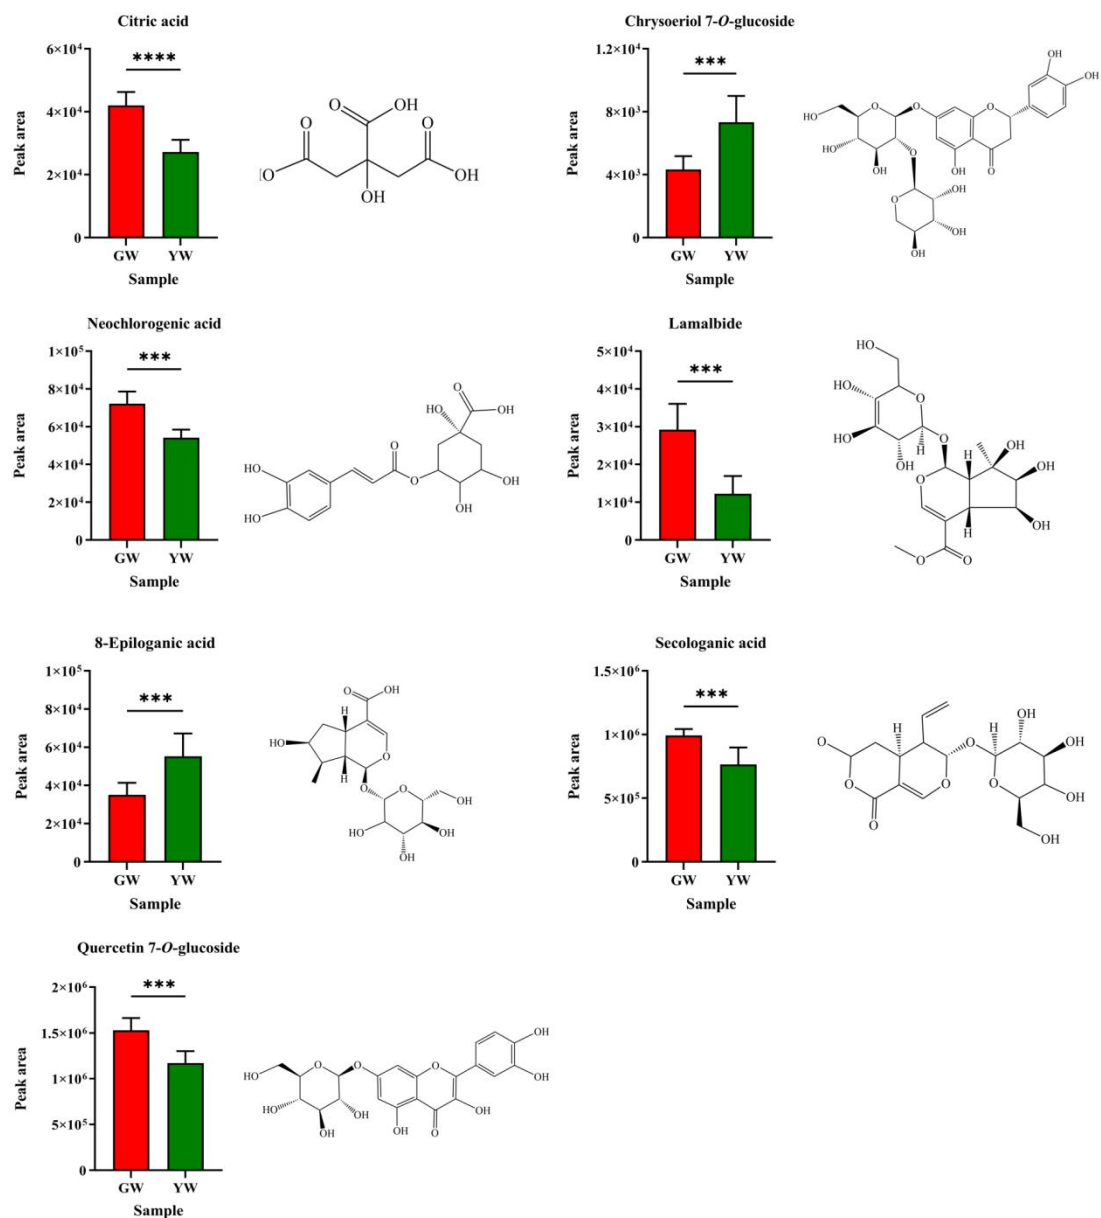

Supplement: s1 [file s1]
